# Supplementary material for: Exploring therapeutic strategies for infantile neuronal axonal dystrophy (INAD/PARK14)
Source: PubMed Central journal article supplement (PMC9889087; doi:10.7554/elife.82555), 2023-01-16

# Suppl Figure 4- Source data 1

## Figure 4B:

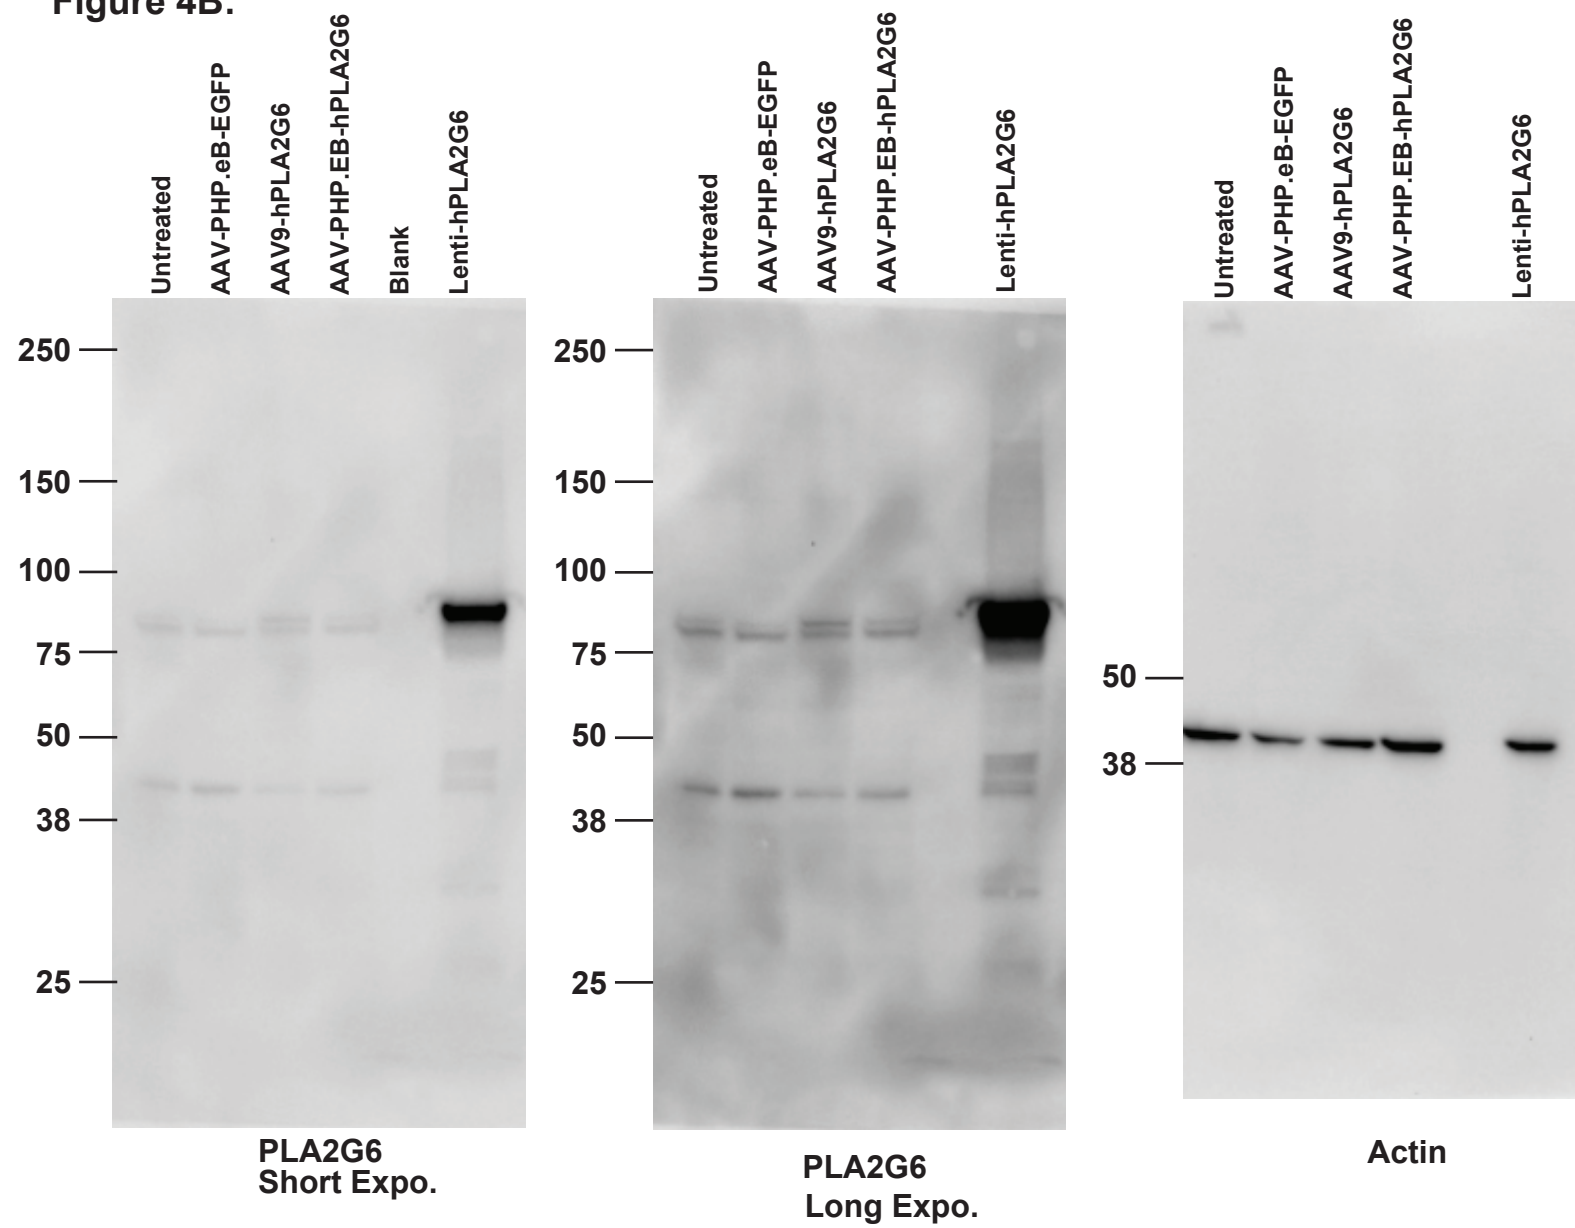

Supplement: elife-82555-fig4-data1.pdf [file elife-82555-fig4-data1.pdf]
