# Supplementary material for: Exploring therapeutic strategies for infantile neuronal axonal dystrophy (INAD/PARK14)
Source: eLife journal article supplement (doi:10.7554/elife.82555), 2023-01-16

# Figure 1- Source data 2

## Figure 1F:

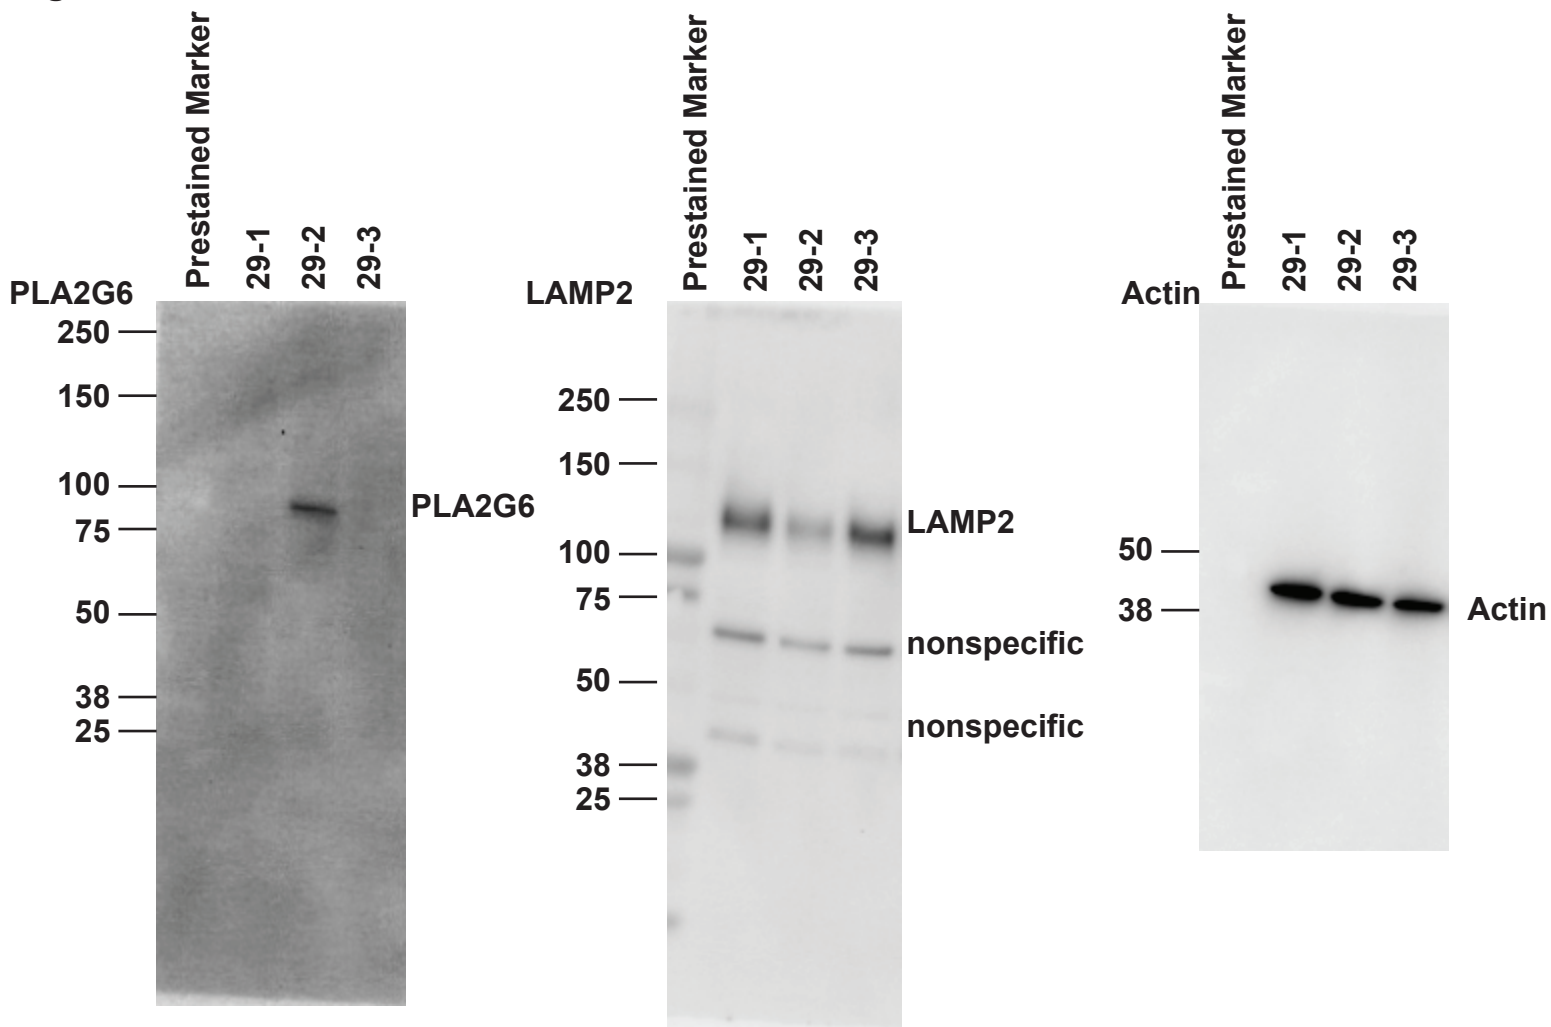

Supplement: fig1-data2 [file elife-82555-fig1-data2-v3.pdf]
