# Supplementary material for: Exploring therapeutic strategies for infantile neuronal axonal dystrophy (INAD/PARK14)
Source: eLife journal article supplement (doi:10.7554/elife.82555), 2023-01-16

# Figure 1- Figure Suppl 1- Source data

Suppl Figure 1A and 1B are the original full gel images.

## Figure 1- Figure Suppl 1C

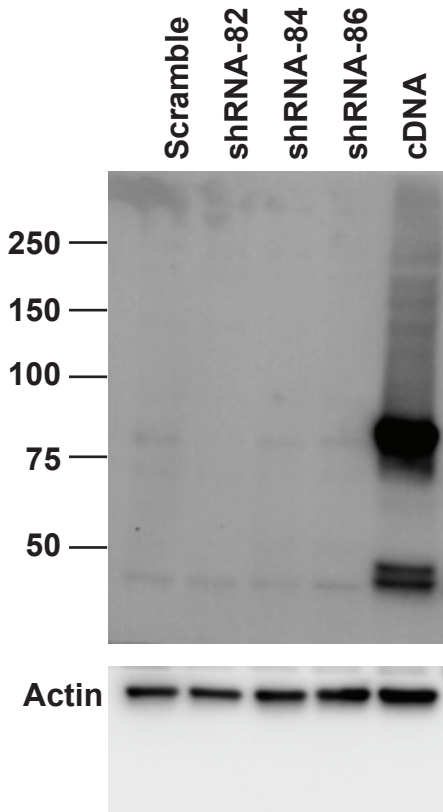

This gel were cutted in half  
Upper half: PLA2G6  
Bottom half: Actin

## Figure 1- Figure Suppl 1E

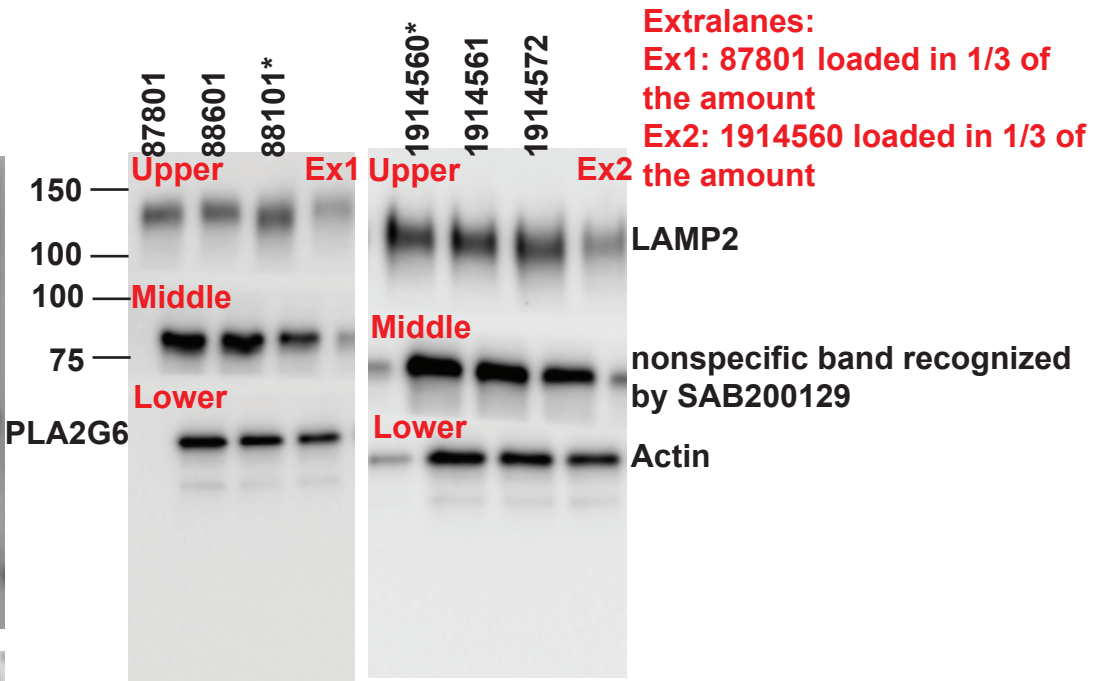

A gel was cutted into three parts:

Upper: LAMP2

Middle: nonspecific band detected by SAB200129

Lower: Actin

The PLA2G6 blot was redone using sc-376563  
(Image below)

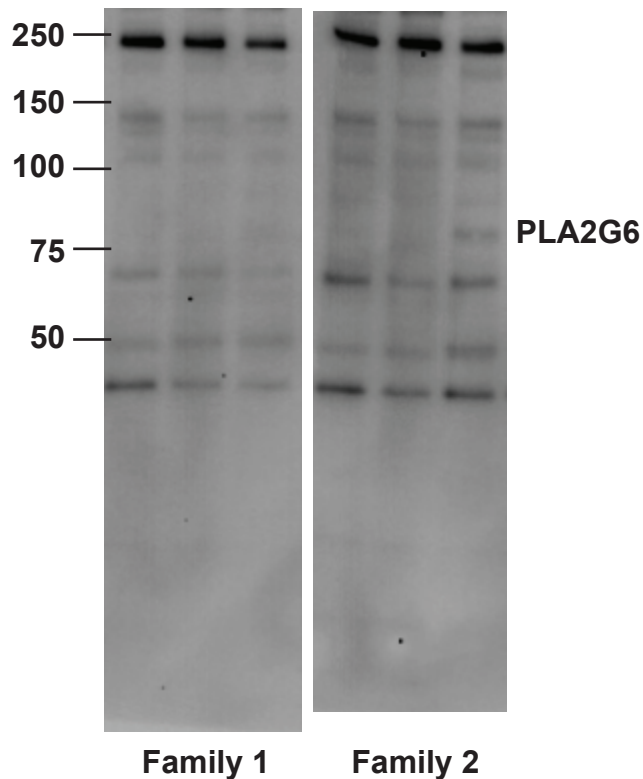

Supplement: fig1-figsupp1-data3 [file elife-82555-fig1-figsupp1-data3-v3.pdf]
