# Supplementary material for: Exploring therapeutic strategies for infantile neuronal axonal dystrophy (INAD/PARK14)
Source: eLife journal article supplement (doi:10.7554/elife.82555), 2023-01-16

### Figure 3- Source data

### Figure 3C:

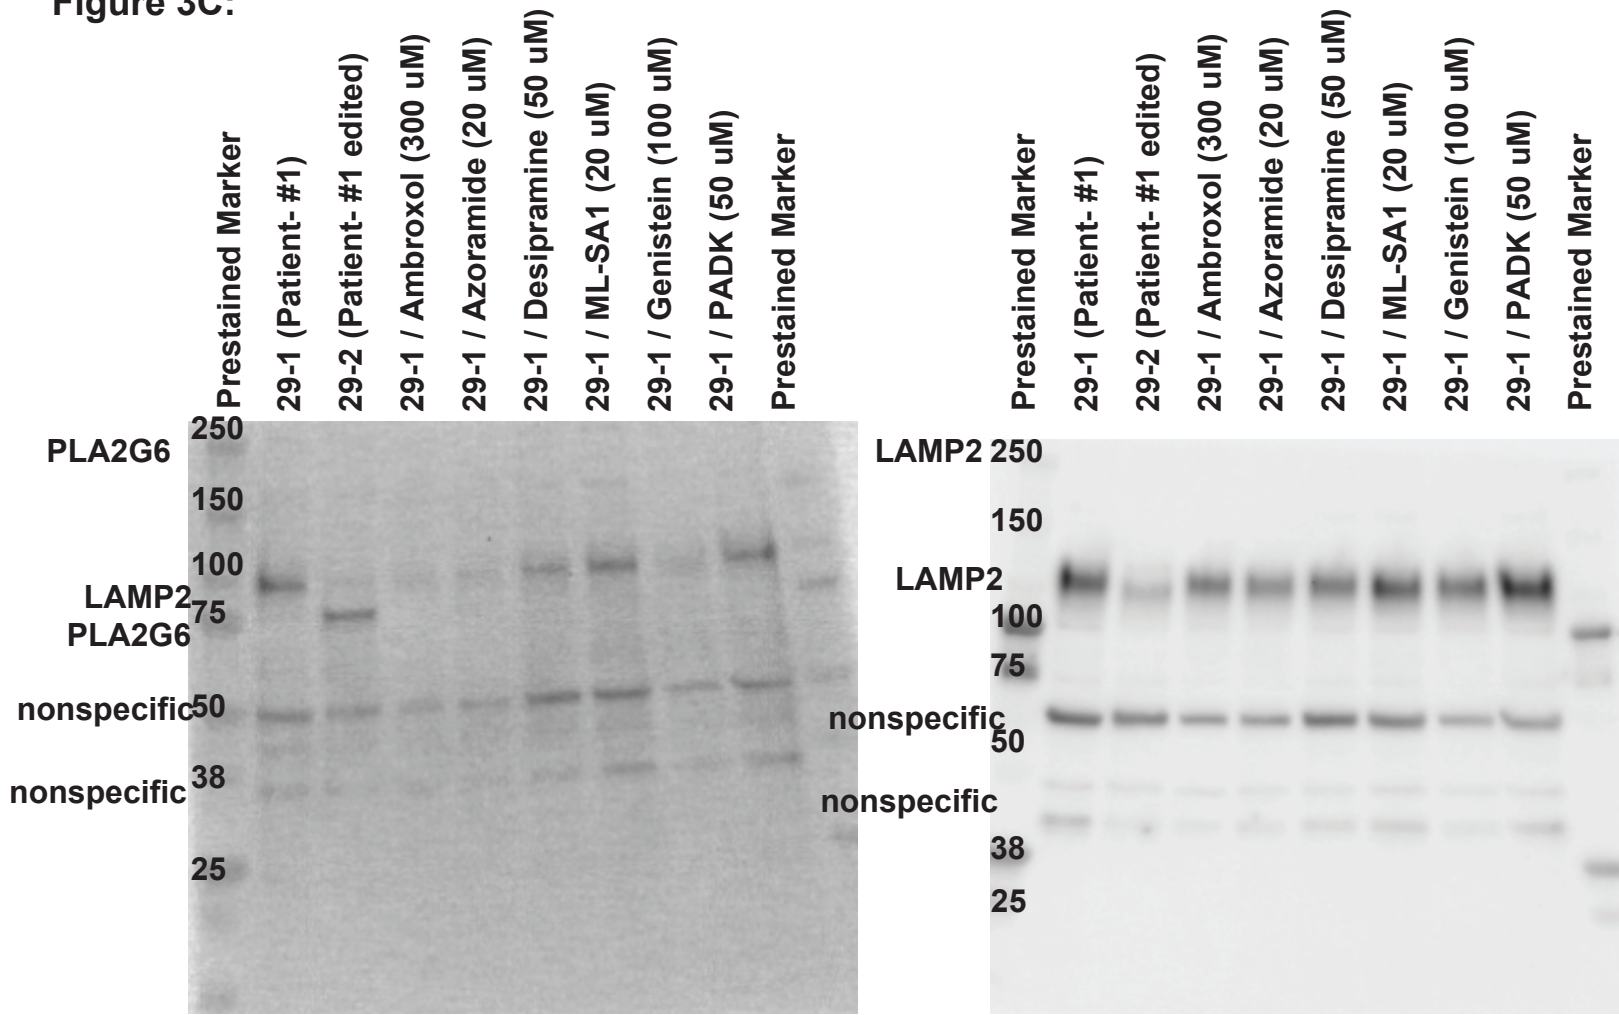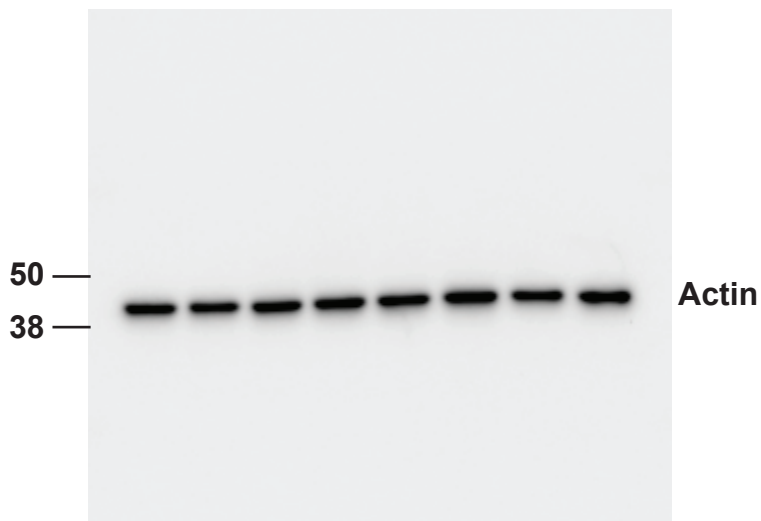

Supplement: fig3-data1 [file elife-82555-fig3-data1-v2.pdf]
