# Supplementary material for: Exploring therapeutic strategies for infantile neuronal axonal dystrophy (INAD/PARK14)
Source: eLife journal article supplement (doi:10.7554/elife.82555), 2023-01-16

# Suppl Figure 4- Source data 2

## Figure 4C:

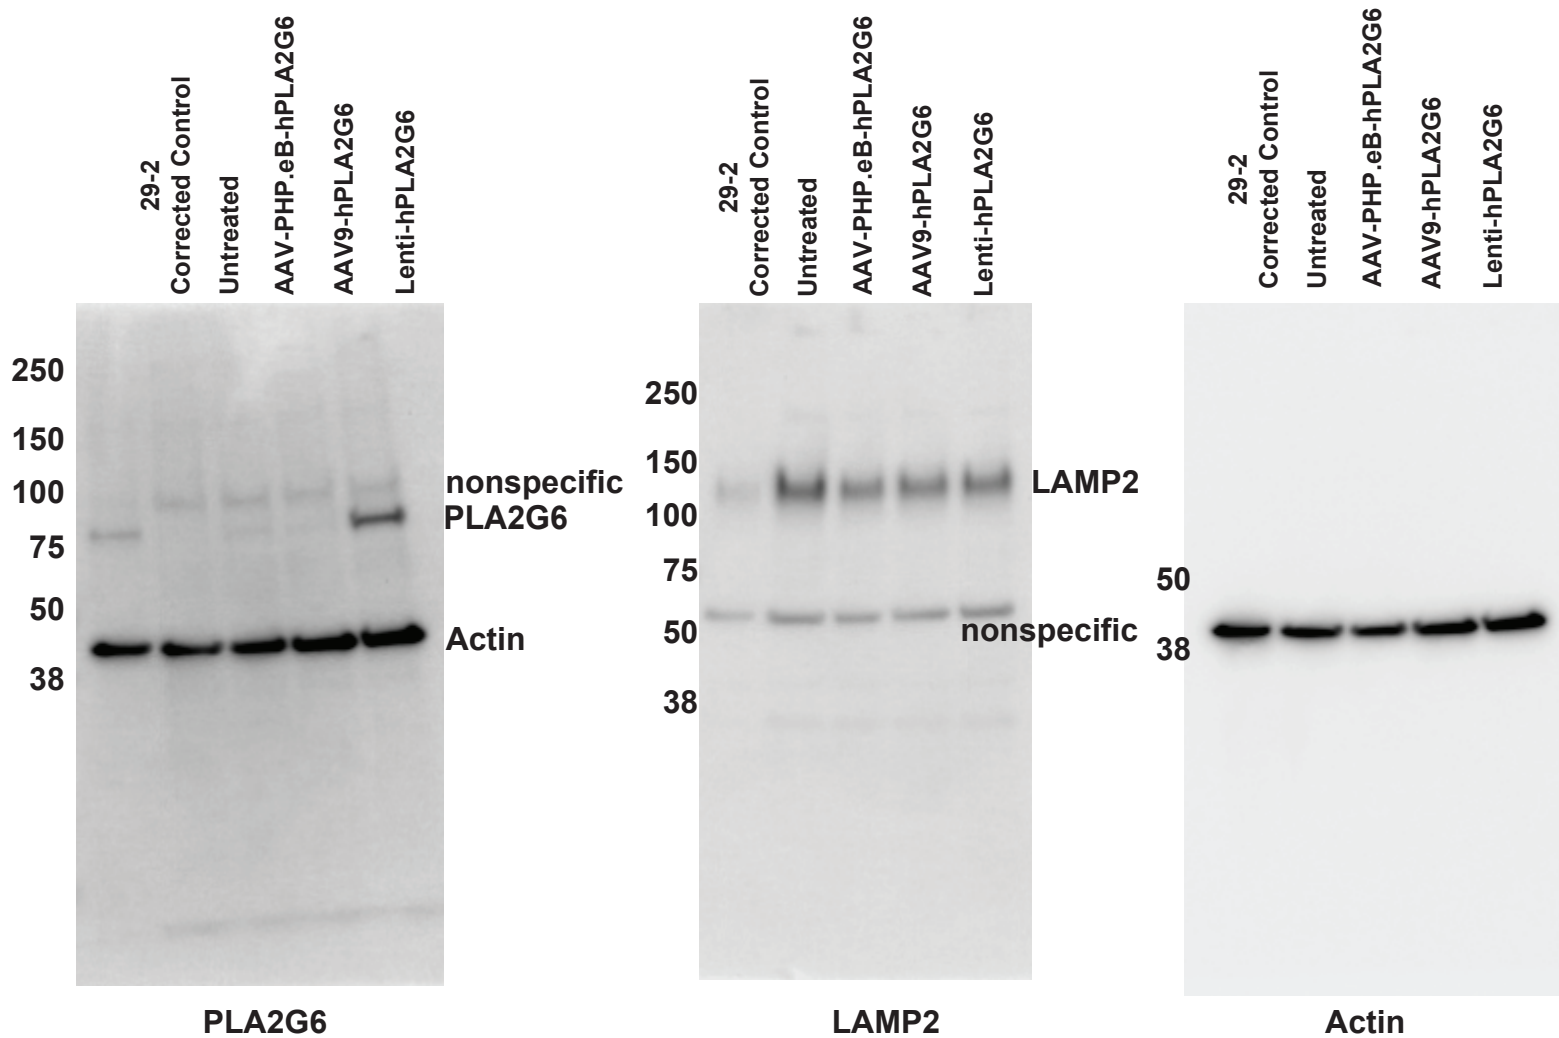

Supplement: fig4-data2 [file elife-82555-fig4-data2-v3.pdf]
