# Supplementary material for: Exploring therapeutic strategies for infantile neuronal axonal dystrophy (INAD/PARK14)
Source: eLife. 2023 Jan 16;12:e82555. doi: 10.7554/eLife.82555 (PMC9889087; doi:10.7554/eLife.82555)
Supplement: Figure 1—figure supplement 1—source data 1. [file elife-82555-fig1-figsupp1-data1.xlsx]

## Sheet: Table 1
Patient	Disease diagnosed	Variants	Genetic	Parental fibroblasts
Patient 1 (88101)	INAD	R37X/T661M	Transheterozygous	87801/88601
Patient 2 (1914560)	INAD	R70X	Homozygous	1914561/1914572
