# Supplementary material for: Exploring therapeutic strategies for infantile neuronal axonal dystrophy (INAD/PARK14)
Source: eLife. 2023 Jan 16;12:e82555. doi: 10.7554/eLife.82555 (PMC9889087; doi:10.7554/eLife.82555)
Supplement: Figure 1—source data 3. [file elife-82555-fig1-data3.xlsx]

## Sheet: Table 2
	NPCs
	Genetically corrected (29-2)	Genetically corrected (29-2)	Genetically corrected (29-2)	Patient dervied (29-1)	Patient dervied (29-1)	Patient dervied (29-1)	Fold-change (Patients/Controls)	P-value
Total Cer	38.7395	27.1582	56.2445	93.8934	90.0586	83.2269	2.18744	0.0061096
Total HexCer	25.5071	14.703	24.5612	41.5071	37.1533	35.9393	1.7693	0.0124598
Hexosylsphingosine (d18:1)	0.00789249	0.00629798	0.01372	0.0128703	0.0144486	0.0135061	1.46271	0.0566005
Sphinganine (d18:0)	0.389314	0.316886	0.585943	0.758429	0.641788	0.612255	1.55747	0.059316
Sphingosine (d18:1)	0.813977	0.66017	2.47269	2.38338	2.34114	2.1535	1.74267	0.169933
Cer(d18:1/14:0)	1.22803	0.821334	1.53544	3.67528	3.26697	3.34415	2.86945	<0.001
Cer(d18:1/16:0)	7.09068	6.7092	15.2293	14.8285	13.1516	12.8595	1.40684	0.238716
Cer(d18:1/18:0)	3.92982	2.90331	7.89088	8.99426	9.63501	8.86003	1.86697	0.0506234
Cer(d18:1/18:1)	0.219373	0.130875	0.263246	0.339134	0.411433	0.374843	1.83443	0.0180993
Cer(d18:1/20:0)	2.94106	2.32259	5.32486	7.17471	7.46458	7.22981	2.06536	0.0149862
Cer(d18:1/20:1)	ND	ND	ND	ND	ND	ND	N/A	N/A
Cer(d18:1/22:0)	0.830005	0.632348	1.39551	2.48458	2.32143	2.14467	2.43212	0.00539064
Cer(d18:1/22:1)	ND	ND	ND	ND	ND	ND	N/A	N/A
Cer(d18:1/24:0)	0.335037	0.259924	0.471833	1.28698	1.21894	1.12907	3.4074	<0.001
Cer(d18:1/24:1)	13.3957	6.88516	14.156	33.242	32.2028	28.9359	2.74069	0.00165023
Cer(d18:1/26:0)	0.00740623	0.0182776	0.00968701	0.0144861	0.0124326	0.0121436	1.10436	0.735066
Cer(d18:1/26:1)	0.00273299	0.00216603	0.00149988	0.0022064	0.00134705	0.00226763	0.909699	0.699368
Cer(d18:0/14:0)	0.327252	0.224916	0.306647	0.952681	0.799865	0.661474	2.81087	0.00445534
Cer(d18:0/16:0)	3.53781	2.69124	3.99298	8.14682	7.38087	6.2025	2.12582	0.004915
Cer(d18:0/18:0)	3.09537	2.22712	3.33962	4.99985	5.06357	4.9469	1.73287	0.00336616
Cer(d18:0/18:1)	0.0688869	0.0847713	0.149629	0.162843	0.144823	0.160708	1.54433	0.0956518
Cer(d18:0/20:0)	0.685012	0.528008	0.847137	2.43722	2.30418	2.12827	3.33454	<0.001
Cer(d18:0/20:1)	ND	ND	ND	ND	ND	ND	N/A	N/A
Cer(d18:0/22:0)	0.679937	0.460311	0.847929	3.61707	3.20008	2.91879	4.89692	<0.001
Cer(d18:0/22:1)	ND	ND	ND	ND	ND	ND	N/A	N/A
Cer(d18:0/24:0)	0.0430248	0.0531053	0.0485561	0.227438	0.200408	0.183402	4.22465	<0.001
Cer(d18:0/24:1)	0.312279	0.196482	0.424732	1.25591	1.22944	1.0841	3.82374	<0.001
Cer(d18:0/26:0)	ND	ND	ND	ND	ND	ND	N/A	N/A
Cer(d18:0/26:1)	0.0100018	0.00703754	0.00903471	0.0514887	0.0488256	0.0484325	5.70478	<0.001
HexCer(d18:1/14:0)	2.02161	1.56803	2.23374	5.83183	3.75422	3.30519	2.2137	0.042589
HexCer(d18:1/16:0)	14.9755	8.45204	14.3321	22.0916	19.087	19.698	1.61222	0.027378
HexCer(d18:1/18:0)	1.89731	1.54899	2.80535	3.99806	4.18721	3.77657	1.91339	0.00836817
HexCer(d18:1/18:1)	0.352858	0.0985746	0.178045	0.215788	0.224294	0.207414	1.02863	0.940225
HexCer(d18:1/20:0)	2.24897	1.49073	2.68973	4.87846	5.34584	4.86756	2.34731	0.00167428
HexCer(d18:1/20:1)	ND	ND	ND	ND	ND	ND	N/A	N/A
HexCer(d18:1/22:0)	2.14596	1.11232	1.8157	2.9333	2.96438	2.57415	1.66966	0.026361
HexCer(d18:1/22:1)	ND	ND	ND	ND	ND	ND	N/A	N/A
HexCer(d18:1/24:0)	1.83782	0.422932	0.495131	1.53296	1.56423	1.48558	1.6629	0.2567
HexCer(d18:1/24:1)	ND	ND	ND	ND	ND	ND	N/A	N/A
HexCer(d18:1/26:0)	0.027124	0.00937997	0.0114495	0.0250101	0.0260576	0.0248804	1.58379	0.171814
HexCer(d18:1/26:1)	ND	ND	ND	ND	ND	ND	N/A	N/A
*Abbreviations: Cer - ceramide; HexCer - hexosylceramide; ND - not detected
