# Supplementary material for: Exploring therapeutic strategies for infantile neuronal axonal dystrophy (INAD/PARK14)
Source: eLife. 2023 Jan 16;12:e82555. doi: 10.7554/eLife.82555 (PMC9889087; doi:10.7554/eLife.82555)
Supplement: Figure 2—source data 1. [file elife-82555-fig2-data1.xlsx]

## Sheet: Table 3
	Cerebellum
	WT-226	WT-234	WT-240	KO/G373R-230	KO/G373R-237	KO/G373R-242	Fold-change (Mutant/WT)	P-value
Total Cer	466.094	319.401	218.733	402.424	412.012	341.897	1.15147	0.536595
Total HexCer	2303.61	1888.35	1499.06	1770.3	1801.65	1598.4	0.908509	0.51082
Hexosylsphingosine (d18:1)	0.0353392	0.0388743	0.0348637	0.0331044	0.0347926	0.0359081	0.951666	0.307747
Sphinganine (d18:0)	5.51258	7.09304	3.59789	5.61922	5.23941	4.75068	0.963329	0.858408
Sphingosine (d18:1)	1.70226	2.61661	1.61921	1.5484	1.35751	1.41022	0.726855	0.171079
Cer(d18:1/14:0)	0.752466	1.1102	0.792649	1.24497	0.776536	1.06036	1.16064	0.467029
Cer(d18:1/16:0)	1.51116	1.43814	0.853676	2.22078	1.82792	1.44027	1.44334	0.14082
Cer(d18:1/18:0)	99.1585	105.689	57.204	170.382	163.678	135.908	1.79342	0.0199997
Cer(d18:1/18:1)	13.9407	13.7598	11.5154	12.817	12.7416	12.1667	0.961988	0.571215
Cer(d18:1/20:0)	34.0251	30.1037	12.6697	37.4414	33.0357	29.36	1.29999	0.332181
Cer(d18:1/20:1)	8.10686	7.30356	6.38253	9.85334	11.9177	9.53514	1.43653	0.0241787
Cer(d18:1/22:0)	2.01859	2.19227	1.41905	2.44259	2.36067	1.97221	1.20348	0.238017
Cer(d18:1/22:1)	0.0128765	0.0140134	0.0120604	0.023234	0.02323	0.015546	1.59203	0.0428348
Cer(d18:1/24:0)	1.50219	1.66875	0.906696	1.66704	1.55975	1.31322	1.11339	0.576636
Cer(d18:1/24:1)	278.362	129.349	101.633	123.894	138.591	113.102	0.737394	0.46584
Cer(d18:1/26:0)	0.0225724	0.0351214	0.0399568	0.0125704	0.0127991	0.0164144	0.427892	0.0250056
Cer(d18:1/26:1)	0.0721474	0.0573154	0.127668	0.0853743	0.086949	0.0670399	0.930899	0.804062
Cer(d18:0/14:0)	0.101921	0.185882	0.704166	0.182995	0.174399	0.147293	0.508773	0.437741
Cer(d18:0/16:0)	0.982956	1.05186	0.888139	1.2888	1.31302	0.915373	1.2033	0.222235
Cer(d18:0/18:0)	11.2139	12.8972	10.2877	21.8517	25.2739	19.0371	1.9234	0.00566712
Cer(d18:0/18:1)	2.20601	2.21285	1.2082	3.31874	3.42762	2.95209	1.72354	0.0202215
Cer(d18:0/20:0)	5.9479	6.11219	6.32236	8.43083	9.90358	8.40169	1.45444	0.00537632
Cer(d18:0/20:1)	0.711846	0.2477	0.396938	0.461819	0.418279	0.286111	0.859729	0.687679
Cer(d18:0/22:0)	0.530759	0.690323	0.762955	1.01286	0.744627	0.817038	1.29762	0.135394
Cer(d18:0/22:1)	0.368404	0.0621981	0.0327877	0.0827174	0.085762	0.0503419	0.472218	0.491989
Cer(d18:0/24:0)	0.285069	0.250321	0.79788	0.277006	0.509378	0.244417	0.773137	0.633556
Cer(d18:0/24:1)	4.25465	2.96791	3.77379	3.4301	3.54987	3.0861	0.915401	0.481772
Cer(d18:0/26:0)	0.000269496	0.000860078	2.04928e-05	0.000576236	2.20582e-05	0.000141788	0.643512	0.672899
Cer(d18:0/26:1)	0.00529499	0.000846206	0.00138531	0.00199782	0.000355974	0.00239702	0.631211	0.579077
HexCer(d18:1/14:0)	6.61533	8.58657	9.01669	9.74426	6.32427	8.55259	1.01662	0.919392
HexCer(d18:1/16:0)	9.08133	11.3238	8.71347	9.64639	7.82687	7.71486	0.865017	0.271604
HexCer(d18:1/18:0)	42.9713	48.8604	39.7622	43.7597	45.0802	40.7242	0.984575	0.830392
HexCer(d18:1/18:1)	140.696	196.232	124.106	140.301	134.955	128.916	0.876666	0.438602
HexCer(d18:1/20:0)	150.941	133.013	153.74	162.145	185.821	145.278	1.12692	0.240119
HexCer(d18:1/20:1)	97.1262	122.304	100.661	105.17	119.552	98.771	1.01063	0.915051
HexCer(d18:1/22:0)	316.188	255.881	237.354	335.497	299.369	270.407	1.11842	0.351804
HexCer(d18:1/22:1)	77.0011	96.0568	112.497	110.887	108.262	98.8054	1.11346	0.377564
HexCer(d18:1/24:0)	1075.73	548.817	422.629	517.226	590.805	513.452	0.79206	0.520323
HexCer(d18:1/24:1)	367.984	454.411	281.349	324.744	293.293	276.196	0.810182	0.249967
HexCer(d18:1/26:0)	12.938	4.56839	2.93013	4.13933	4.12334	3.35389	0.568421	0.39802
HexCer(d18:1/26:1)	6.34611	8.29911	6.30016	7.03954	6.23434	6.23105	0.931228	0.536814
*Abbreviations: Cer - ceramide; HexCer - hexosylceramide; ND - not detected
