# Supplementary material for: Exploring therapeutic strategies for infantile neuronal axonal dystrophy (INAD/PARK14)
Source: eLife. 2023 Jan 16;12:e82555. doi: 10.7554/eLife.82555 (PMC9889087; doi:10.7554/eLife.82555)
Supplement: Figure 3—source data 2. [file elife-82555-fig3-data2.xlsx]

## Sheet: Table 4
Drug	Pathway	Status	References
Fingolimod	Sphingolipid Metabolism	FDA Approved	Rosen et al., 2003
Ozanimod	Sphingolipid Metabolism	FDA Approved	Scott et al., 2016
Fumonisin	Sphingolipid Metabolism	-	Desai et al., 2002
Miglustat	Sphingolipid Metabolism	FDA Approved	Alfonso et al., 2005
Ibiglustat	Sphingolipid Metabolism	FDA Approved	Mistry et al., 2018
Ambroxol	Endolysosomal Pathway	EMA Approved	Magalhaes et al., 2018
Genistein	Endolysosomal Pathway	Clinical Trials	Lin et al., 2008 and Moskot et al., 2014
Hydroxychloroquine	Endolysosomal Pathway	FDA Approved	Mauthe et al., 2018
Lonafarnib	Endolysosomal Pathway	Clinical Trials	Hernandez et al., 2019
NCGC607	Endolysosomal Pathway	Clinical Trials	Aflaki et al., 2016
Rapamycin	Endolysosomal Pathway	FDA Approved	Zhu et al., 2019
PADK	Endolysosomal Pathway	-	Hwang et al., 2019
ML-SA1	Endolysosomal Pathway	-	Shen et al., 2012
VER-155008	Endolysosomal Pathway	-	Yang et al., 2018
deoxygalactonojirimycin	Endolysosomal Pathway	Clinical Trials	Khanna et al., 2010
Omigapil	Potential PD drug	Clinical Trials	Olanow et al., 2006
Taurine	Potential PD drug	FDA Approved	Wang et al., 2021
CuATSM	Potential PD drug	Clinical Trials	Hung et al., 2012
Metformin	Potential PD drug	FDA Approved	Agostini et al., 2021
Azoramide	Potential PD drug	Clinical Trials	Fu et al., 2015 and Ke et al., 2020
